# Supplementary material for: Psychological distress, cardiometabolic diseases and musculoskeletal pain: A cross-sectional, population-based study of syndemic ill health in a Dutch fishing village
Source: J Glob Health. 2021 Apr 17;11:04029. doi: 10.7189/jogh.11.04029 (PMC8068410; doi:10.7189/jogh.11.04029)
Supplement: Online Supplementary Document [file jogh-11-04029-s001.pdf]

## Supplementary 1

Figure 1. Flowchart Participant inclusion

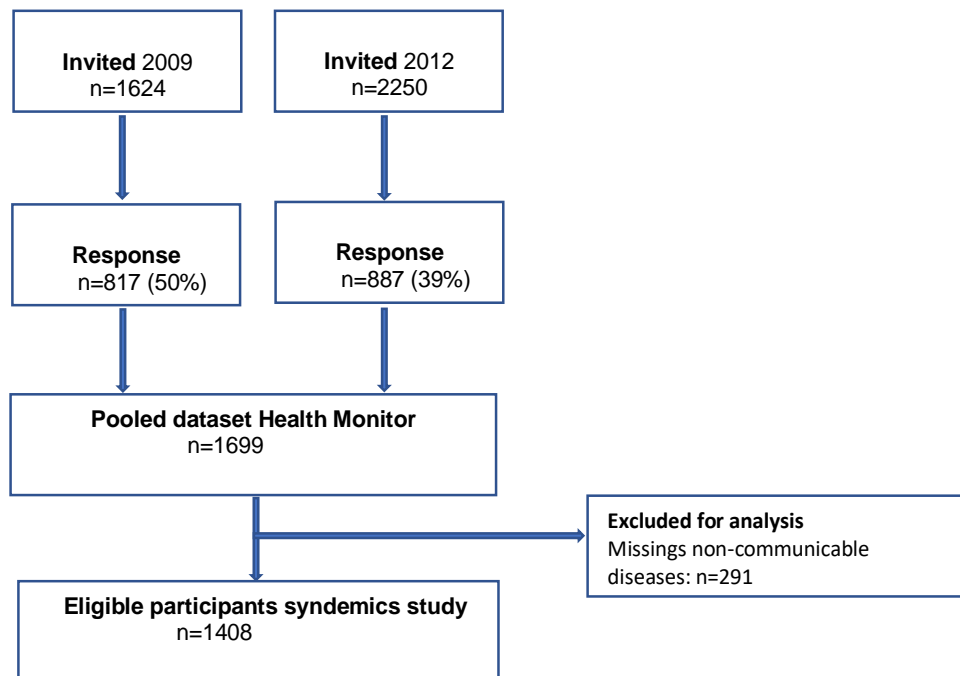

## Appendix S2 Variable description non-communicable diseases

The following seventeen diseases were assessed across the two age groups and two waves of the Health Monitor Survey (2009;2012):

1) Severe or persistent chronic back disorder; 2) severe or chronic neck and shoulder pain; 3) severe or chronic pain in wrist/hand/elbow; 4) arthritis of hip or knee; 5) 'rheumatoid arthritis'; 6) chronic eczema; 7) psoriasis; 8) asthma, chronic bronchitis, emphysema or COPD; 9) chronic enteritis (> 3 months); 10) migraine or severe headache; 11) venous condition; 12) high blood pressure; 13) coronary heart disease 14) stroke; 15) cancer; 16) heart failure 17) diabetes

In 2009 the conditions were assessed through the following question: "Based on the following list of illnesses and conditions, please tick if you currently have or have had these in the last 12 months": 'Yes, not determined by a doctor'; 'Yes, determined by a doctor'; 'No'. (variable 1-17)

In 2012 the conditions were measured in the following ways: "Please tick if you currently have or have had these in the last 12 months": 'Yes'; 'No' (variable 2-12) or "Have you ever had..." (variable 13-15), followed by "If so, have you had this [disease, red.] in the past 12 months?" 'Yes'; 'No'. Heart failure (variable 16) was measured by asking "Have you had another [other than coronary heart disease, red]. severe heart condition in the past 12 months, for example heart failure or angina pectoris?" 'Yes'; 'No'. Diabetes (variable 17) was assessed by asking "Have you been under treatment or monitored by the general practitioner or specialist in the past 12 months" or "Did you start using insulin within 6 months of your diabetes diagnosis?" 'Yes'; 'No'.

Table S3 Percentages contextual factors

|                          | Total  | No<br>CMD,<br>No<br>PD | CMD<br>or<br>PD | CMD<br>and<br>PD | No<br>Mus,<br>No<br>PD | Mus<br>or<br>PD | Mus<br>and<br>PD | No<br>Mus,<br>No<br>CMD | Mus<br>or<br>CMD | Mus<br>and<br>CMD |
|--------------------------|--------|------------------------|-----------------|------------------|------------------------|-----------------|------------------|-------------------------|------------------|-------------------|
| Contextual factors       | n=1408 | n=798                  | n=510           | n=100            | n=809                  | n=475           | n=124            | n=710                   | n=485            | n=213             |
| Age                      |        |                        |                 |                  |                        |                 |                  |                         |                  |                   |
| 19-34, %n                | 17     | 75                     | 23              | 3                | 71                     | 26              | 3                | 84                      | 16               | 1                 |
| 35-49                    | 22     | 75                     | 24              | 1                | 70                     | 26              | 5                | 72                      | 25               | 3                 |
| 50-64                    | 25     | 55                     | 39              | 6                | 55                     | 36              | 9                | 42                      | 41               | 17                |
| 65-79                    | 31     | 39                     | 49              | 12               | 47                     | 42              | 13               | 30                      | 44               | 27                |
| >80                      | 5      | 32                     | 42              | 26               | 38                     | 35              | 28               | 16                      | 48               | 36                |
| Gender                   |        |                        |                 |                  |                        |                 |                  |                         |                  |                   |
| Male, %n                 | 46     | 61                     | 33              | 6                | 64                     | 30              | 6                | 53                      | 34               | 14                |
| Female                   | 55     | 53                     | 39              | 8                | 52                     | 37              | 10               | 48                      | 35               | 16                |
| Education                |        |                        |                 |                  |                        |                 |                  |                         |                  |                   |
| Low, %n                  | 55     | 49                     | 41              | 10               | 52                     | 36              | 12               | 42                      | 37               | 21                |
| Middle                   | 29     | 66                     | 30              | 4                | 63                     | 32              | 6                | 62                      | 29               | 9                 |
| High                     | 17     | 67                     | 29              | 4                | 67                     | 29              | 4                | 61                      | 32               | 7                 |
| Civil status             |        |                        |                 |                  |                        |                 |                  |                         |                  |                   |
| Married or partnered, %n | 78     | 59                     | 34              | 6                | 59                     | 34              | 8                | 51                      | 35               | 15                |
| Widowed or divorced      | 11     | 36                     | 47              | 17               | 40                     | 39              | 21               | 29                      | 46               | 26                |
| Single                   | 11     | 61                     | 35              | 4                | 66                     | 30              | 4                | 71                      | 23               | 7                 |
| Employment               |        |                        |                 |                  |                        |                 |                  |                         |                  |                   |
| Paid work, %n            | 51     | 71                     | 28              | 2                | 67                     | 30              | 3                | 68                      | 26               | 6                 |
| Housewife/man            | 10     | 54                     | 38              | 8                | 51                     | 36              | 13               | 40                      | 42               | 18                |
| Benefits                 | 4      | 43                     | 43              | 14               | 47                     | 33              | 20               | 49                      | 35               | 16                |
| Retirement               | 36     | 39                     | 48              | 13               | 47                     | 39              | 14               | 29                      | 44               | 27                |
| Financial stress         |        |                        |                 |                  |                        |                 |                  |                         |                  |                   |
| No, %n                   | 84     | 59                     | 35              | 6                | 60                     | 33              | 8                | 50                      | 35               | 15                |
| Yes                      | 16     | 47                     | 41              | 12               | 47                     | 38              | 15               | 54                      | 29               | 17                |
| Loneliness               |        |                        |                 |                  |                        |                 |                  |                         |                  |                   |
| Low score, %n            | 65     | 63                     | 33              | 3                | 66                     | 30              | 5                | 54                      | 34               | 13                |
| High score               | 35     | 45                     | 42              | 14               | 43                     | 41              | 16               | 46                      | 36               | 19                |
| Smoking                  |        |                        |                 |                  |                        |                 |                  |                         |                  |                   |
| No, %n                   | 39     | 61                     | 32              | 8                | 61                     | 31              | 9                | 55                      | 30               | 15                |
| Former smoker            | 40     | 51                     | 41              | 8                | 55                     | 37              | 9                | 42                      | 41               | 17                |
| Yes                      | 21     | 60                     | 35              | 5                | 58                     | 34              | 8                | 60                      | 29               | 12                |
| Alcohol intake           |        |                        |                 |                  |                        |                 |                  |                         |                  |                   |
| <7(f)/14(m) units/wk, %n | 78     | 57                     | 36              | 7                | 59                     | 32              | 9                | 51                      | 36               | 14                |
| ≥7(f)/14(m) units/wk     | 22     | 59                     | 35              | 7                | 52                     | 40              | 8                | 52                      | 31               | 18                |
| Body mass index          |        |                        |                 |                  |                        |                 |                  |                         |                  |                   |
| BMI <25, %n              | 39     | 67                     | 28              | 5                | 63                     | 29              | 8                | 65                      | 27               | 8                 |
| BMI 25-29.9              | 43     | 56                     | 37              | 7                | 57                     | 35              | 8                | 46                      | 39               | 15                |
| BMI ≥30                  | 18     | 36                     | 52              | 12               | 46                     | 40              | 14               | 31                      | 39               | 30                |
| Physical activity norm   |        |                        |                 |                  |                        |                 |                  |                         |                  |                   |
| > 5 days/wk, %n          | 43     | 58                     | 37              | 5                | 57                     | 36              | 3                | 51                      | 36               | 13                |
| ≥ 5 days/wk              | 57     | 56                     | 36              | 9                | 58                     | 32              | 6                | 51                      | 32               | 17                |

CMD - cardiometabolic diseases; MUS - musculoskeletal pain; PD - psychological distress
